# Supplementary material for: Impact of prenatal cold stress on placental physiology, inflammatory response, and apoptosis in rats
Source: PubMed Central journal article supplement (PMC5777773; doi:10.18632/oncotarget.23257), 2017-12-14
Supplement: oncotarget-08-115304-s001.pdf [file oncotarget-08-115304-s001.pdf]

# Impact of prenatal cold stress on placental physiology, inflammatory response, and apoptosis in rats

## SUPPLEMENTARY MATERIALS

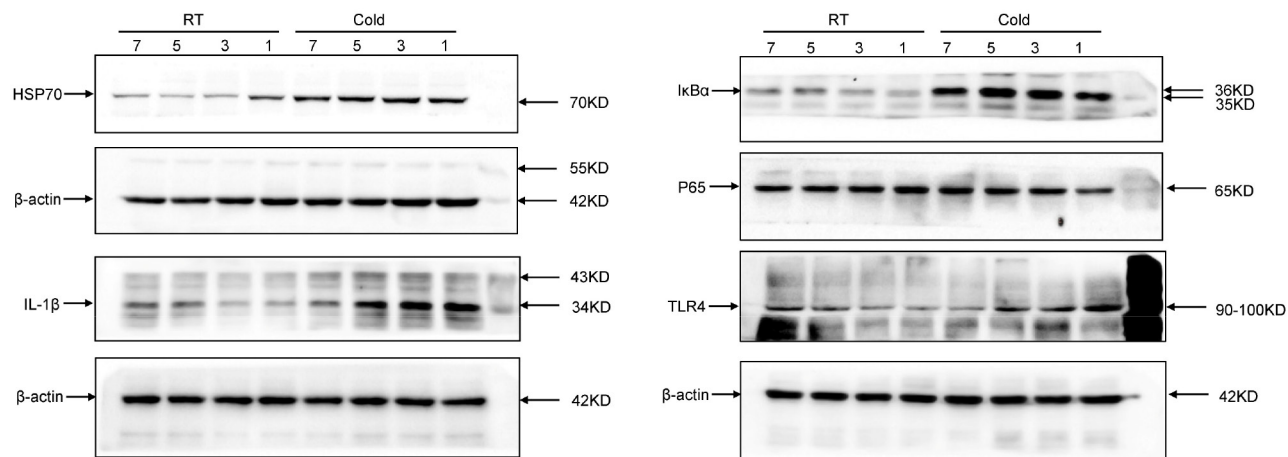

**Supplementary Figure 1: Impact of prenatal cold stress on the activation of the HSP70/TLR4/NF-κB signaling pathway in placenta.** Full length blots of cropped images shown in Figure 3. Position of bands for the protein molecular weight makers are indicated to the right of the blots.

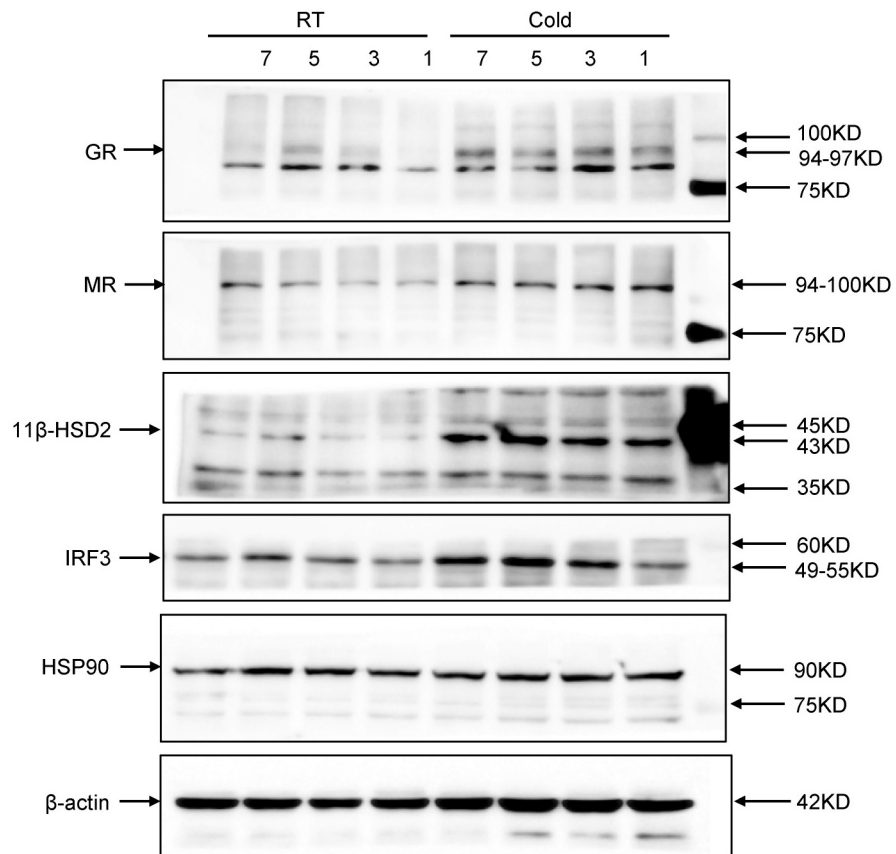

**Supplementary Figure 2: Effect of prenatal cold stress on the expression of GR., MR, 11β-HSD2, and IRF3 proteins.** Full length blots of cropped images shown in Figure 4. Position of bands for the protein molecular weight makers are indicated to the right of the blots.

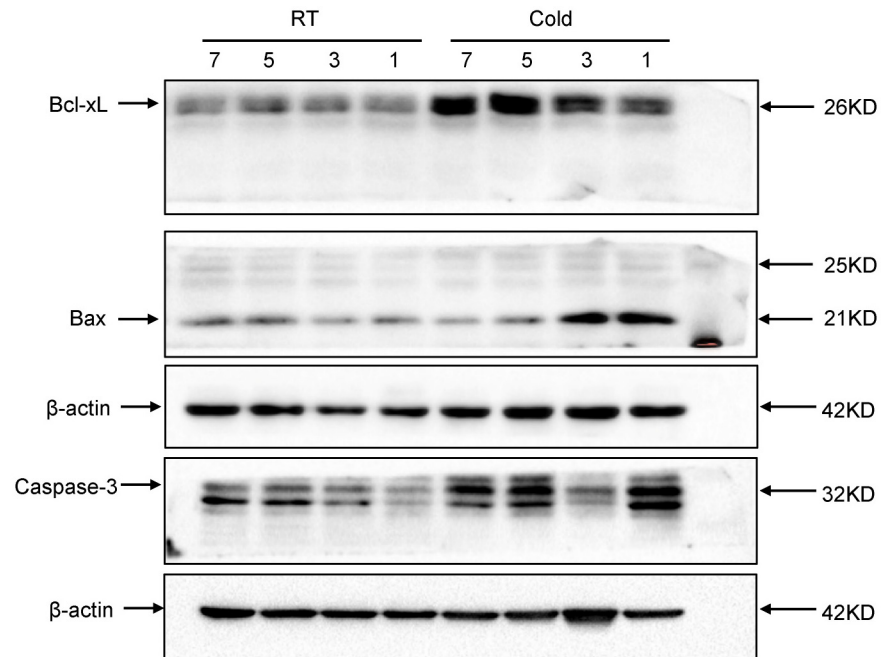

**Supplementary Figure 3: Effect of prenatal cold stress on the expression of Bcl-xL, Bax and Caspase-3 proteins.** Full length blots of cropped images shown in Figure 5. Position of bands for the protein molecular weight makers are indicated to the right of the blots.
